# Supplementary material for: Variation between countries in the frequency of diabetic ketoacidosis at first presentation of type 1 diabetes in children: a systematic review
Source: Springer Nature journal article supplement (doi:10.1007/s00125-012-2690-2), 2012-08-29
Supplement: MOESM1 [file 8091114]

## ESM Methods

Pubmed - (((("diabetic ketoacidosis"[MeSH Terms]) OR ("diabetic"[All Fields] AND ("ketoacidosis"[All Fields] OR "ketosis"[All Fields] OR "acidosis"[All Fields])) OR ("diabetic ketoacidosis"[All Fields])) AND ("diagnosis"[MeSH Subheading] OR "diagnos\*"[All Fields])) AND ((Humans[Mesh]) AND ((infant[MeSH] OR child[MeSH] OR adolescent[MeSH])))

Web of Science – ("diabetic ketoacidosis" OR ("diabetic" AND ("ketoacidosis" OR "ketosis" OR "acidosis"))) AND (child\* OR adolescen\* OR infan\* OR (preschool age) OR (school age)) AND (diagnos\*)

Scopus - (TITLE-ABS-KEY((child\* OR adolescen\* OR infan\* OR (preschool age) OR (school age) OR teen\*))) AND (TITLE-ABS-KEY("diabetic ketoacidosis" OR ("diabetic" AND ("ketoacidosis" OR "ketosis" OR "acidosis")))) AND (TITLE-ABS-KEY(diagnos\*))

EMBASE – ((exp diabetic ketoacidosis/) OR ("diabetic ketoacidosis" or ("diabetic" and ("ketoacidosis" or "ketosis" or "acidosis"))).mp.) AND (exp diagnosis/ OR diagnos\*.mp.) [Limit to: (Human Age Groups Child unspecified age)]

CINAHL - (\*DIABETIC KETOACIDOSIS/ OR ("diabetic ketoacidosis" OR ("diabetic" AND ("ketoacidosis" OR "ketosis" OR "acidosis")))).ti,ab) AND (DIAGNOSIS/ OR diagnos\*.ti,ab) [Limit to: (Age Groups All Child)]
